# Supplementary material for: Exploring g-C 3 N 4 as a green additive for biodegradable poly(butylene adipate- co -terephthalate) film with enhanced UV shielding and mechanical properties
Source: Royal Society of Chemistry journal article supplement (doi:10.1039/d3ra07407b), 2024-01-01
Supplement: d3ra07407b1.pdf [file d3ra07407b1.pdf]

## Electronic Supplementary Information

### Exploring of g-C<sub>3</sub>N<sub>4</sub> as the Green Additive for Biodegradable Poly(butylene adipate-co-terephthalate) Film with Enhanced UV Shielding and Mechanical Properties

Maolin Zhang<sup>a</sup>, Yining Zhang<sup>a</sup>, Qi Liu<sup>a</sup>, Wen-Qing He<sup>\*a,b</sup>, Jialei Liu<sup>\*a</sup>

<sup>a</sup> Institute of Environment and Sustainable Development in Agriculture, Chinese Academy of Agricultural Sciences, Beijing 100081, China

<sup>b</sup> Institute of Western Agriculture, Chinese Academy of Agricultural Sciences, Changji, Xinjiang Uygur Autonomous Region, 831100, China.

\*Corresponding author email: hewenqing@cass.cn, liujialei@mail.ipc.ac.cn

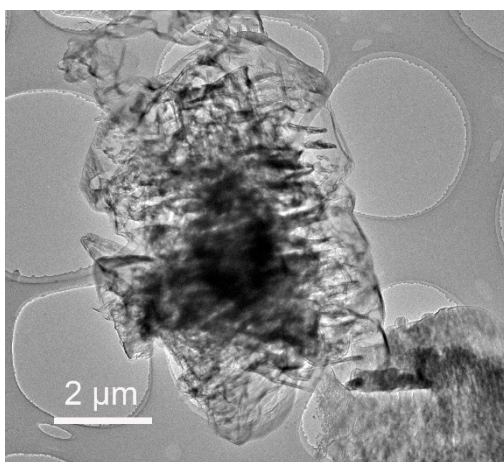

**Figure S1.** TEM image of g-C<sub>3</sub>N<sub>4</sub>.

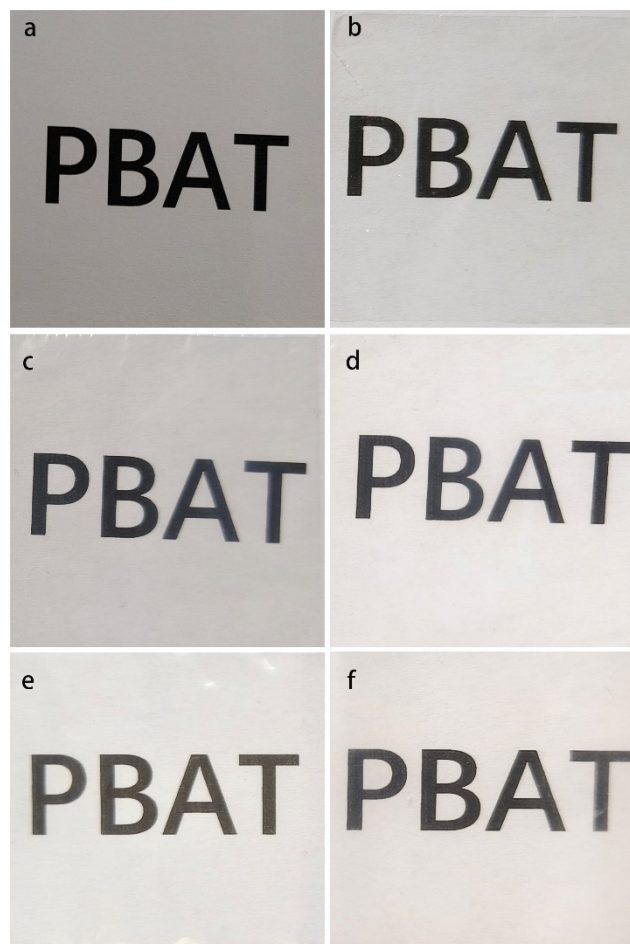

**Figure S2.** Digital photos of (a) blank A4 paper, (b) A4 Paper covered with pure PBAT, (c) A4 Paper covered with pure UV-0(0.25)/PBAT, (d) A4 Paper covered with pure UV-0(0.5)/PBAT, (e) A4 Paper covered with pure g-C<sub>3</sub>N<sub>4</sub>(0.25)/PBAT, (f) A4 Paper covered with pure g-C<sub>3</sub>N<sub>4</sub>(0.5)/PBAT.

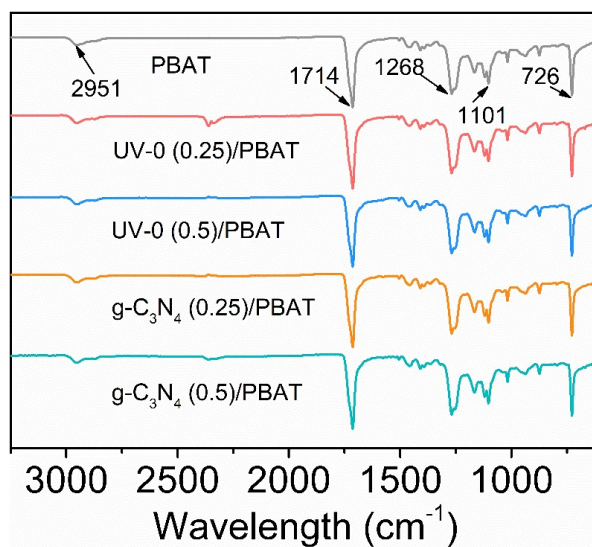

**Figure S3.** FTIR spectra of films PBAT, UV-0 (0.25)/PBAT, UV-0 (0.5) /PBAT, g-C<sub>3</sub>N<sub>4</sub> (0.25)/PBAT, and g-C<sub>3</sub>N<sub>4</sub> (0.5)/PBAT, respectively.
